# Supplementary material
Source: Springer Nature journal article supplement (https://www.springermedizin.de/resource/supplementary/13031_2013_130_MOESM2_ESM.pdf/9645226)

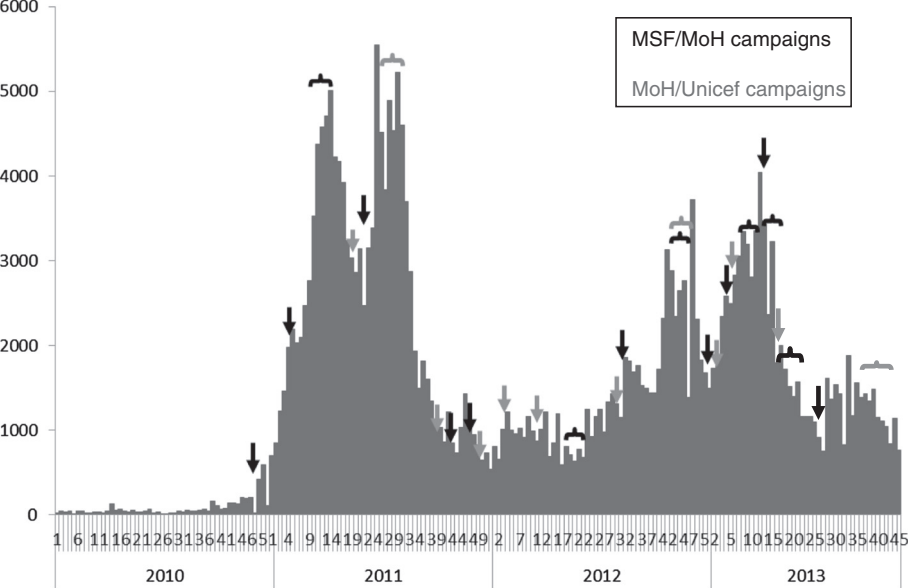

Supplement: MOESM2 [file 9645226]
